# Supplementary material for: Nine Months into the COVID-19 Pandemic: A Longitudinal Study Showing Mental Health and Movement Behaviours Are Impaired in UK Students
Source: PubMed Central journal article supplement (PMC7999965; doi:10.3390/ijerph18062930), 2021-03-12
Supplement: ijerph-18-02930-s001.pdf [file ijerph-18-02930-s001.pdf]

**Table S1.** Results of Information Criterion of the Covariance Structure Autoregressive heterogenous for each analysis.

|                    | <b>-2LL</b> | <b>AIC</b> | <b>BIC</b> |
|--------------------|-------------|------------|------------|
| Mental wellbeing   | 3648.39     | 3658.39    | 3679.56    |
| Perceived stress   | 3333.04     | 3343.04    | 3364.22    |
| Sedentary behavior | 9155.26     | 9165.26    | 9186.43    |
| MVPA               | 6669.72     | 6669.72    | 6700.89    |

The table summarises the three fit-criterion (-2 times the log-likelihood [-2LL], Akaike's Information Criterion [AIC], and the Bayesian Information Criterion [BIC]) for each analysis.
